# Supplementary material for: High performance potassium–sulfur batteries and their reaction mechanism
Source: Royal Society of Chemistry journal article supplement (doi:10.1039/d0ta03602a), 2020-01-01
Supplement: d0ta03602a1.pdf [file d0ta03602a1.pdf]

## Supporting Information

### High Performance Potassium-Sulfur Batteries and Its Reaction Mechanism

Xinxin Zhao,<sup>a</sup> Youran Hong,<sup>b</sup> Mingren Cheng,<sup>a</sup> Shiwen Wang,<sup>c</sup> Lei Zheng,<sup>d</sup> Jiangwei Wang,<sup>b\*</sup> Yunhua Xu<sup>a,c\*</sup>

<sup>a</sup>School of Materials Science and Engineering, Key Laboratory of Advanced Ceramics and Machining Technology (Ministry of Education), Tianjin Key Laboratory of Composite and Functional Materials, Tianjin University, Tianjin 300072, China.

E-mail: yunhua.xu@tju.edu.cn

<sup>b</sup>Center of Electron Microscopy and State Key Laboratory of Silicon Materials, School of Materials Science and Engineering, Zhejiang University, Hangzhou 310027, China.

<sup>c</sup>College of Materials and Chemical Engineering, Zhengzhou University of Light Industry, Zhengzhou 450001, China.

<sup>d</sup>Beijing Synchrotron Radiation Facility, Institute of High Energy Physics, Chinese Academy of Sciences, Beijing 100049, China.

<sup>e</sup>Collaborative Innovation Center of Chemical Science and Engineering (Tianjin), Tianjin 300072, China.

**Keywords:** potassium-sulfur battery, small-molecule sulfur cathode, free-standing electrode, high energy density, electrospun carbon fiber

## **Experimental Section**

### **Preparation of PCNF mat**

The free-standing PCNF mat was prepared using an versatile electrospinning process, followed by a carbonization treatment. Typically, polyacrylonitrile (PAN, MW = 150,000 g mol<sup>-1</sup>, J&K, 1.0 g) was dissolved in N,N-dimethylformamide (DMF, > 99.5%, Titan, 10 mL) followed by magnetic stirring at 80 °C overnight to form an viscous and homogeneous solution. The obtained solution was loaded into a 5 mL plastic syringe with a 21-gauge blunt tip needle. Electrospinning process was then carried out by applying an voltage of 15 kV on the needle with a flow rate of 0.8 mL h<sup>-1</sup>. The polymer fiber mat was collected using a grounded roller with a distance of 14 cm to the syringe needle. The collected PAN mat was firstly stabilized at 280 °C for 3 hours in air with a heating rate of 2 °C min<sup>-1</sup> followed by carbonization at a high temperature of 800 °C for 2 hours with a heating rate of 5 °C min<sup>-1</sup> under nitrogen atmosphere, donated as PCNF-800. Finally, the resultant carbon fiber mat was treated at 350 °C in air for 2 hours, and the PCNF mat was obtained.

### **Preparation of PCNF/S composite**

The mixture of bulk sulfur (cyclo-S<sub>8</sub>) (99.5%, Alfa Aesar) and the PCNF mat in a mass ratio (3:1) was sealed into glass tube under vacuum and heated at 500 °C for 5 hours with a heating ramp of 5 °C min<sup>-1</sup>. The resulting product was then heated at 200 °C for 4 hours in argon atmosphere with a heating rate of 2 °C min<sup>-1</sup> to remove the superficial sulfur and finally free-standing microporous carbon nanofiber/small-molecule sulfur (PCNF/S) composite was obtained with a sulfur loading of 0.5-1.0 mg cm<sup>-2</sup>.

### **Materials and structural characterizations**

Morphological characterizations of the PCNF and PCNF/S composite mats were carried out on field-emission scanning electron microscopy (FESEM, Hitachi, S-4800) and transmission electron microscopy (TEM, JEOL, JEM-2100F). Both SEM and TEM energy dispersive X-ray spectroscopy (EDS) were performed on Oxford energy spectrometer. X-ray diffraction (XRD)

patterns were collected on Rigaku Ultima IV with Cu K $\alpha$  radiation source ( $V = 40$  kV,  $I = 40$  mA and  $\lambda = 1.5418$  Å). Raman spectra were collected using a laser wavelength of 532 nm on a Renishaw InVIA Reflex Raman microspectrometer. X-ray photoelectron spectroscopy (XPS) measurement was performed on a Thermo Scientific K-Alpha X-ray photoelectron spectrometer with mono Al K $\alpha$  radiation at room temperature. The microporous structure of the PCNF and PCNF/S composite mats was analyzed using CO<sub>2</sub> adsorption-desorption on a ASAP 2420-4 volumetric adsorption analyzer (Micromeritics). The pore size distribution was calculated using nonlocalized DFT method, and the pore volume was obtained using Horvath-Kawazoe method. The thermal stability of bulk cyclo-S<sub>8</sub> and the PCNF/S composite was investigated using a thermo-gravimetric analysis (TGA, TA, Q50) in nitrogen with a heating rate of 10 °C min<sup>-1</sup>. Element analysis was applied on Elementar, Vario Micro Cube. The Fourier transform infrared spectroscopy (FTIR) spectra were recorded using KBr pellets on a Bruker Alpha spectrometer. The UV-vis samples were prepared by collecting the electrolytes from the disassembled batteries and the data were conducted on Jindao UV-3600 plus.

### **Electrochemical characterization**

The free-standing PCNF/S composites were directly used as working electrodes (~7 mm×7 mm) with the weight of 1-2 mg to assemble CR2032-type coin cells in an argon-filled glove box (H<sub>2</sub>O, O<sub>2</sub> < 0.1 ppm). Potassium metal (K, 99.5%, Sigma-Aldrich) was used as counter and reference electrode and Celgard®2400 (Celgard, LLC Corp.) as separator. The K metal anode used in this work is ~6 mm\*6 mm in size, ~300-500  $\mu$ m in thickness with a mass of ~12 mg. 50  $\mu$ L 1.0 M potassium bis(fluorosulfonyl)imid (KFSI)-dimethoxyethane (DME) and 0.8 M potassium hexafluorophosphate (KPF<sub>6</sub>) in ethylene carbonate (EC)/diethyl carbonate (DEC) (1:1 by volume) were used as electrolytes.

The galvanostatic charge/discharge performance of the half-cells was tested on a LAND CT-2001A (Wuhan) instrument in an voltage range of 0.5-3.0 V (vs. K<sup>+</sup>/K) at ambient temperature. Cyclic voltammetry (CV) curves were carried out on CHI660E electrochemical test station at a

scan rate of  $0.02 \text{ mV s}^{-1}$  in the range 0.5-3.0 V. A Solartron electrochemical workstation (1400+1470) was employed for electrochemical impedance spectrometry (EIS) test in the frequency range of 0.01 Hz to 1 MHz with an ac amplitude of 5 mV.

In order to rule out the influence of element sulfur in the salt of KFSI, 0.8 M  $\text{KPF}_6$  in EC/DEC (1:1) was applied for SEM, TEM, *ex-situ* XPS and sulfur K-edge XANES measurements. In addition, all the batteries were potassiated and depotassiated to desired voltages and then kept for 6 hours. The potassiated/depotassiated PCNF/S composite electrodes were retrieved and rinsed with DEC solvent several times to remove residual electrolyte before analysis.

For the *ex-situ* XPS depth-profile test, the PCNF/S composite electrodes were potassiated and depotassiated to desired voltages at  $20 \text{ mA g}^{-1}$ . The washed electrodes were sealed in a tightly-closed XPS sample holder in an argon-filled glove box and then transferred into the XPS test chamber without exposure to air. The profiles were obtained after a 20 s etching process with a rate of  $0.32 \text{ nm s}^{-1}$ .

### **TOF-SIMS measurement**

The time-of-flight secondary ion mass spectrometry (TOF-SIMS) analysis was conducted on a TOF-SIMS 5 spectrometer (ION-TOF GmbH, 2015). The spectrometer was run at an operating pressure below  $1 \times 10^{-9}$  mbar.  $\text{Bi}^{3+}$  primary ion clusters at 60 keV were employed on a  $200 \times 200 \mu\text{m}^2$  area. Sputtering process was done using a 10 keV  $\text{Ar}^+$  beam with an etching rate of  $0.214 \text{ nm s}^{-1}$  and  $\text{SiO}_2$  as reference. Data acquisition and post-processing analyses were performed using Software Surface Lab. Both positive and negative ion profiles were recorded and analyzed. The intensity reported used a logarithmic scale in order to magnify the low-intensity signals.

### **Sulfur K-edge XANES spectroscopy analysis**

The sulfur K-edge X-ray absorption near-edge structure (sulfur K-edge XANES) data of the PCNF/S composite electrodes at different potassiated/depotassiated states were collected in partial fluorescence yield mode at beamline 4B7A of Beijing Synchrotron Radiation Facility

(BSRF). The incoming X-ray beam was monochromatized by a fixed-exit Si (111) double-crystal monochromator. Monochromator energy was calibrated against the peak of the white line of  $K_2SO_4$  at 2.4824 keV. Furthermore, to establish a relationship between the edge energy and oxidation state, bulk sulfur (cyclo- $S_8$ ) and phenyl disulfide were applied as reference materials. For sample preparation, the reference materials and PCNF/S composite electrodes were neatly pressed onto conductive double sided carbon adhesive tape in an argon-filled glove box to avoid the side reactions with oxygen and humidity. All of the raw XANES spectra were processed using Athena software package.

### The calculation of energy density

The energy density value  $E$  (Wh/kg) calculation process was showed as follows:

$$E = C_{d-total} * V_d \quad (1)$$

Where  $C_{d-total}$  represents the discharge capacity based on the total weight including active material, binder and conductive agents,  $V_d$  represents the average discharge voltage.

$$C_{d-total} = (C_d * m_{active}) / (m_{total} + m_{collector}) \quad (2)$$

Where  $C_d$  represents the discharge capacity obtained from the literature,  $m_{active}$  represents the weight of active electrode material,  $m_{total}$  represents the total weight of the electrode including active electrode material, binder and conductive agents, and  $m_{collector}$  represents the mass of the current collectors.

$$m_{active} = L_{active} * A_{electrode} \quad (3)$$

$$m_{total} = m_{active} / w \quad (4)$$

$$m_{collector} = L_{collector} * A_{electrode} \quad (5)$$

Where  $L_{active}$  represents the area loading of the active materials,  $A_{electrode}$  represents the area of the electrode, and  $w$  represents the mass percentage of active material in the electrode. (The  $L_{active}$ ,  $L_{collector}$ , and  $A_{electrode}$  were set to be  $1 \text{ mg cm}^{-2}$ ,  $5 \text{ mg cm}^{-2}$  and  $1 \text{ cm}^2$ , respectively, when the values were not provided in the literature.)

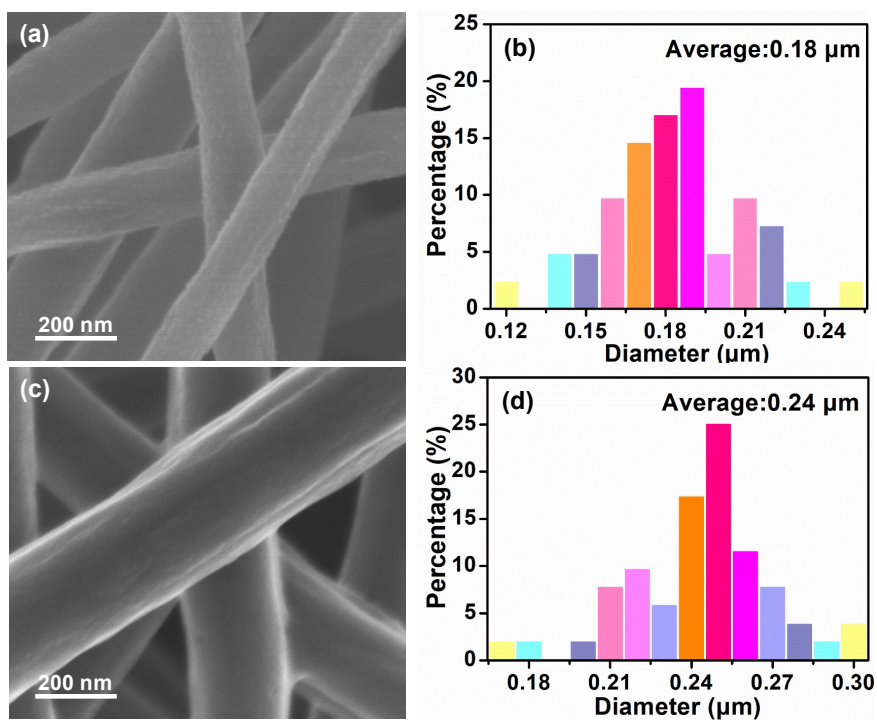

**Figure S1.** (a,c) SEM images and (b,d) diameter distribution of the (a,b) PCNF mat and (c,d) PCNF/S composite.

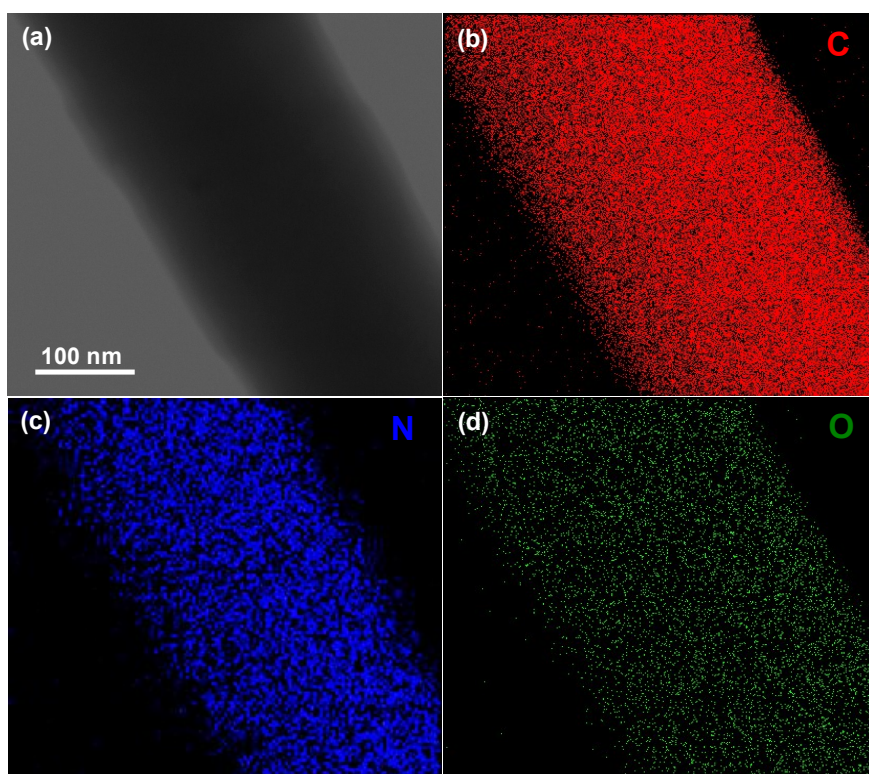

**Figure S2.** (a) Light-field image and EDS element mapping images of (b) C, (c) N and (d) O of the PCNF/S composite.

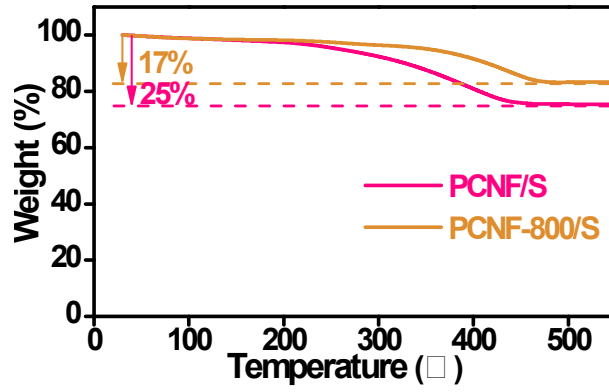

**Figure S3.** TGA curves of PCNF/S and PCNF-800/S composites.

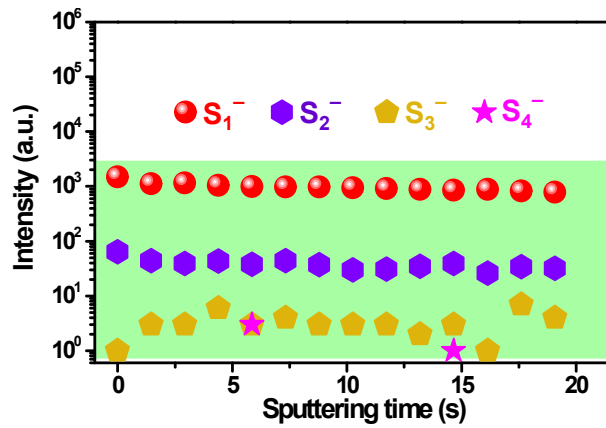

**Figure S4.** The second sputtering process under negative ion sputtering of the PCNF/S composite.

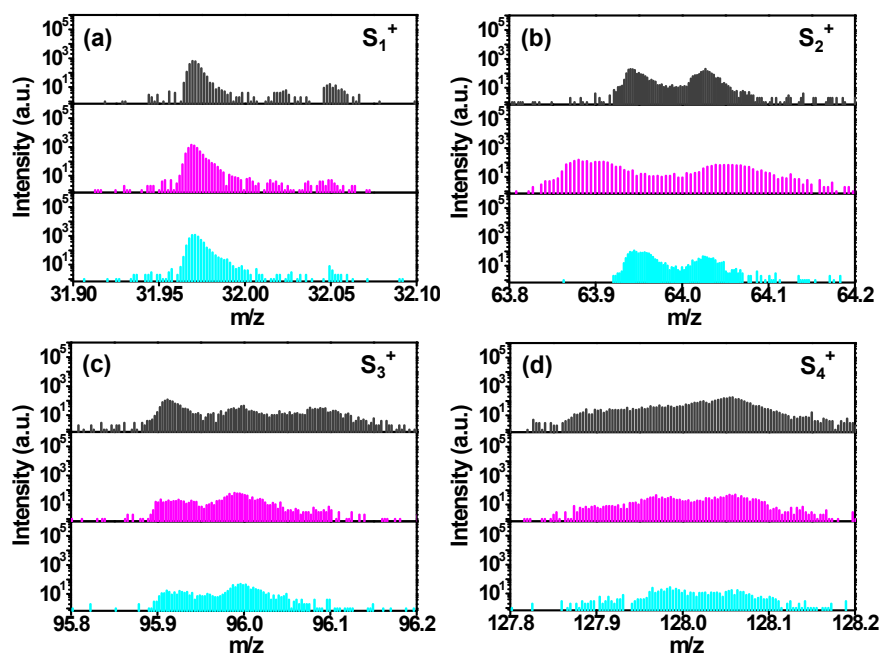

**Figure S5.** Positive ion mass spectra of TOF-SIMS analysis of the PCNF/S composite: (a)  $S_1^+$ , (b)  $S_2^+$ , (c)  $S_3^+$  and (d)  $S_4^+$ . The black curves are on the pristine surface, the pinks are the curves after the first sputtering and the light blues are those after second sputtering process, respectively.

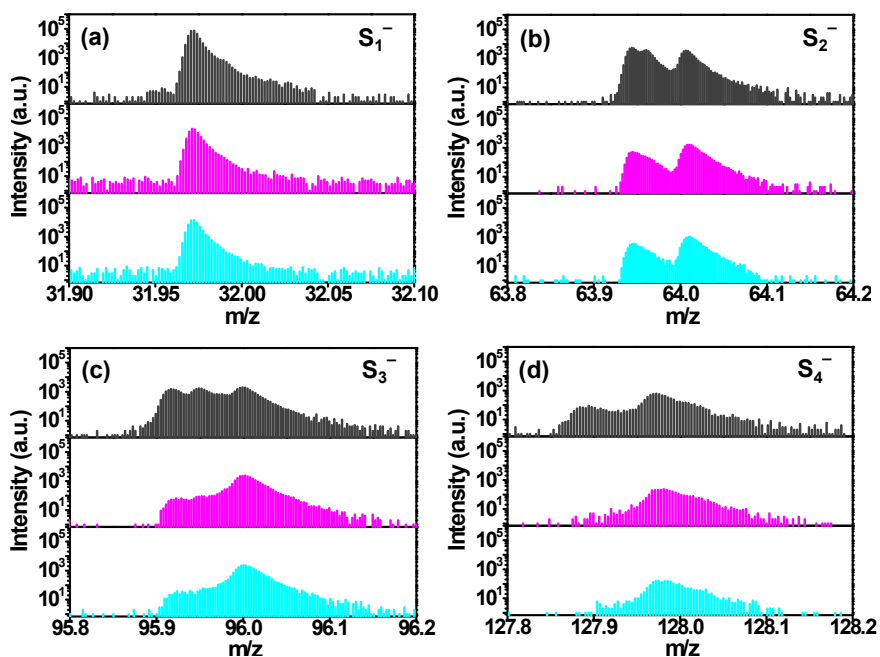

**Figure S6.** Negative ion mass spectra of TOF-SIMS analysis of the PCNF/S composite: (a)  $S_1^-$ , (b)  $S_2^-$ , (c)  $S_3^-$  and (d)  $S_4^-$ . The black curves are on the pristine surface, the pinks are the curves



after the first sputtering and the light blues are those after second sputtering process, respectively.

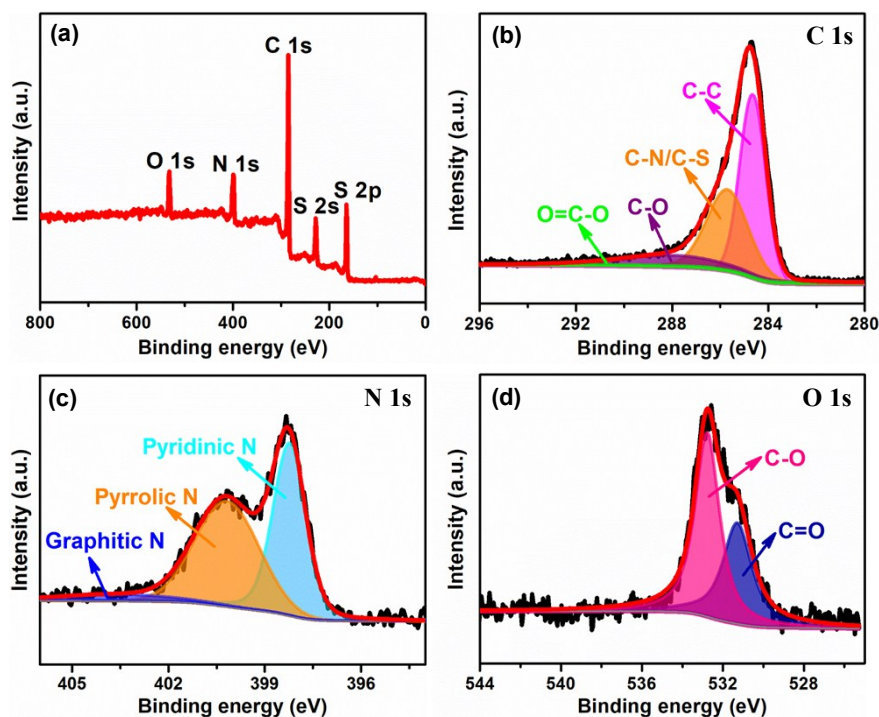

**Figure S7.** Chemical property characterization of the PCNF/S composite: (a) XPS survey and high-resolution XPS spectra of (b) C 1s, (c) N 1s and (d) O 1s, respectively.

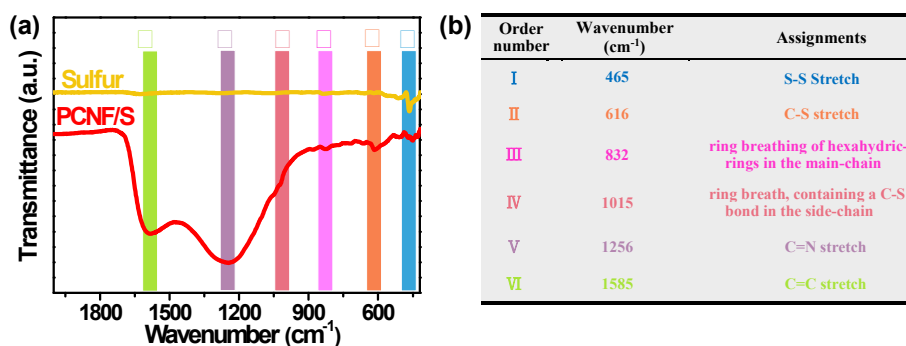

**Figure S8.** Chemical property characterization of the PCNF/S composite: (a) FTIR spectra of bulk sulfur and the PCNF/S composite and (b) summary of FTIR peaks and assignments.

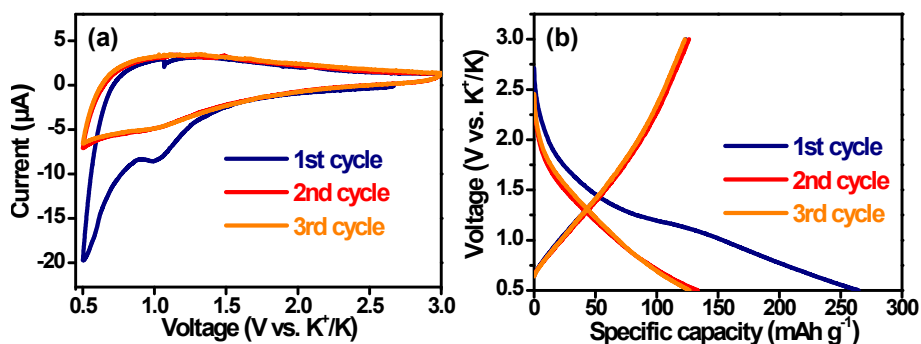

**Figure S9.** Electrochemical performance of the PCNF electrodes with the electrolyte of 1.0 M KFSI in DME: (a) CV curves at a scan rate of  $0.05 \text{ mV s}^{-1}$ , (b) galvanostatic charge/discharge profiles at  $20 \text{ mA g}^{-1}$ .

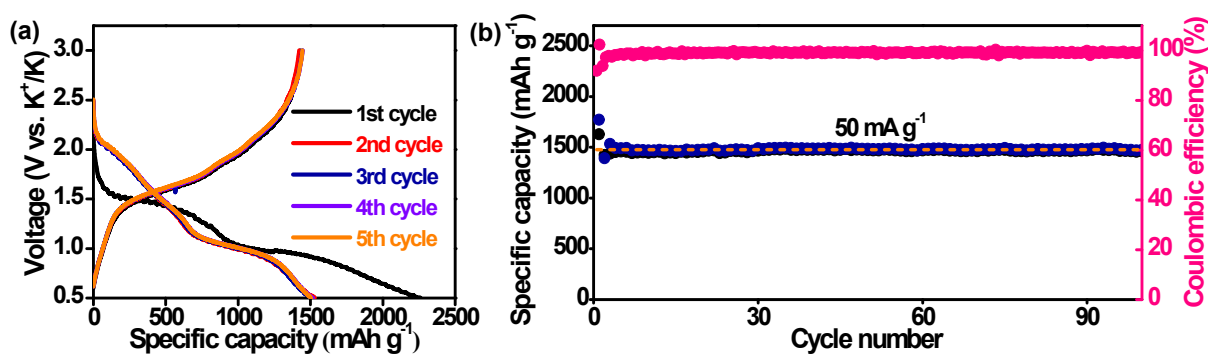

**Figure S10.** Electrochemical performance of the PCNF/S composite electrodes in the voltage window of 0.5-3.0 V with the electrolyte of 0.8 M KPF<sub>6</sub> in EC/DEC: (a) galvanostatic charge/discharge profiles in the first five cycles at  $20 \text{ mA g}^{-1}$  and (b) cycling stability at  $50 \text{ mA g}^{-1}$ .

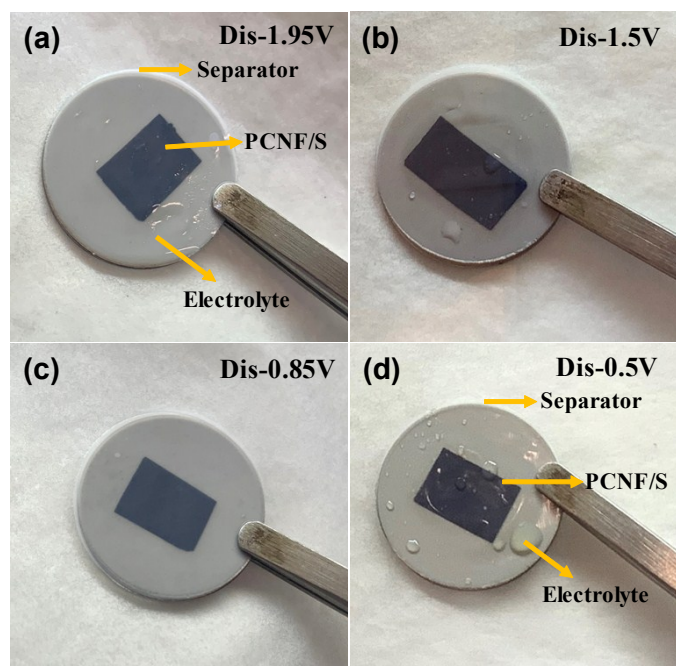

**Figure S11.** Optical photographs of PCNF/S composite electrodes after disassembling the batteries at different potassiation states in the electrolyte of 0.8 M  $\text{KPF}_6$  in EC/DEC.

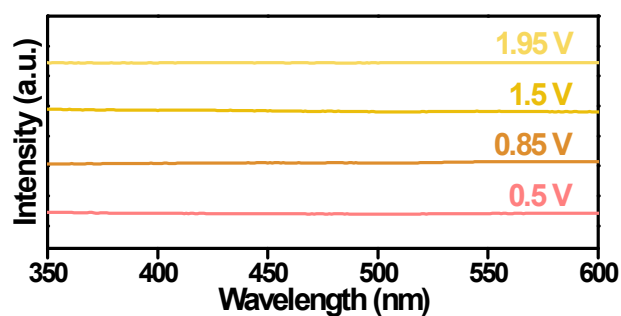

**Figure S12.** UV-vis spectra of electrolytes collected from the disassembled batteries at different discharge states in the electrolyte of 0.8 M  $\text{KPF}_6$  in EC/DEC.

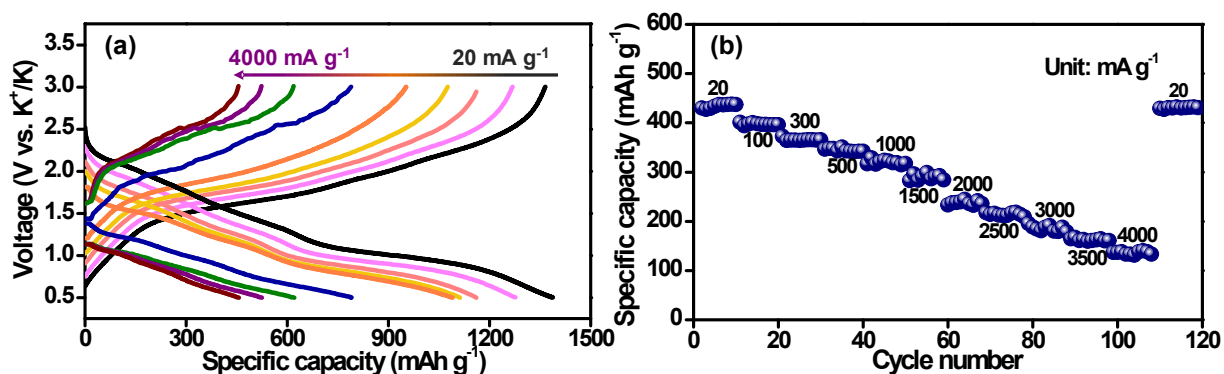

**Figure S13.** Rate capability of the PCNF/S composite electrode of (a) voltage profiles of Figure 3c, (b) rate performance based on the whole electrode weight.

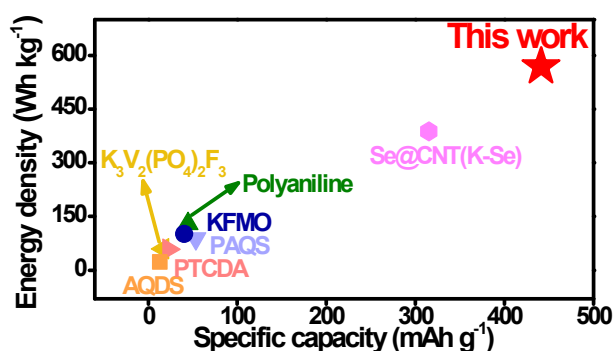

**Figure S14.** Comparison of energy density of the PCNF/S composite electrode with those of representative reported cathode materials for KIBs in literature.<sup>[S1-S7]</sup> (Values are taken or estimated from the references and the capacity was calculated based on the whole weight of the electrode, including active materials, conductive agents, binders and current collectors.)

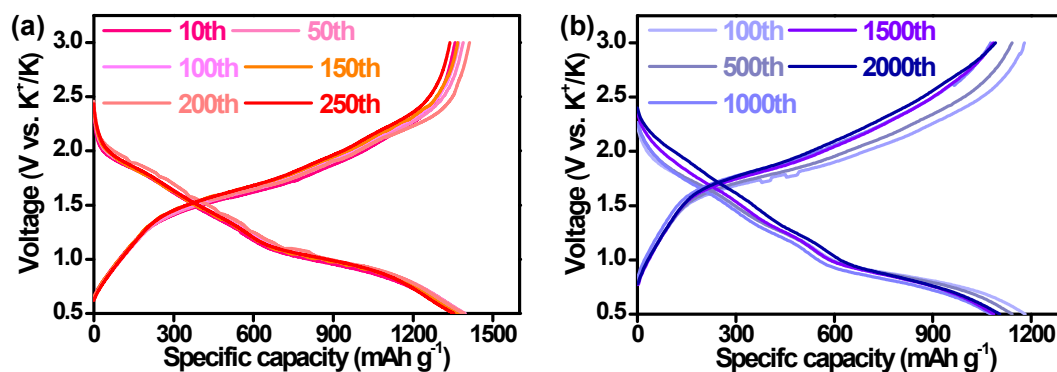

**Figure S15.** Voltage profiles in selected galvanostatic charge/discharge cycles of the PCNF/S composite electrode of (a) at 20 mA g<sup>-1</sup> of Figure 3e and (b) at 200 mA g<sup>-1</sup> of Figure 3f.

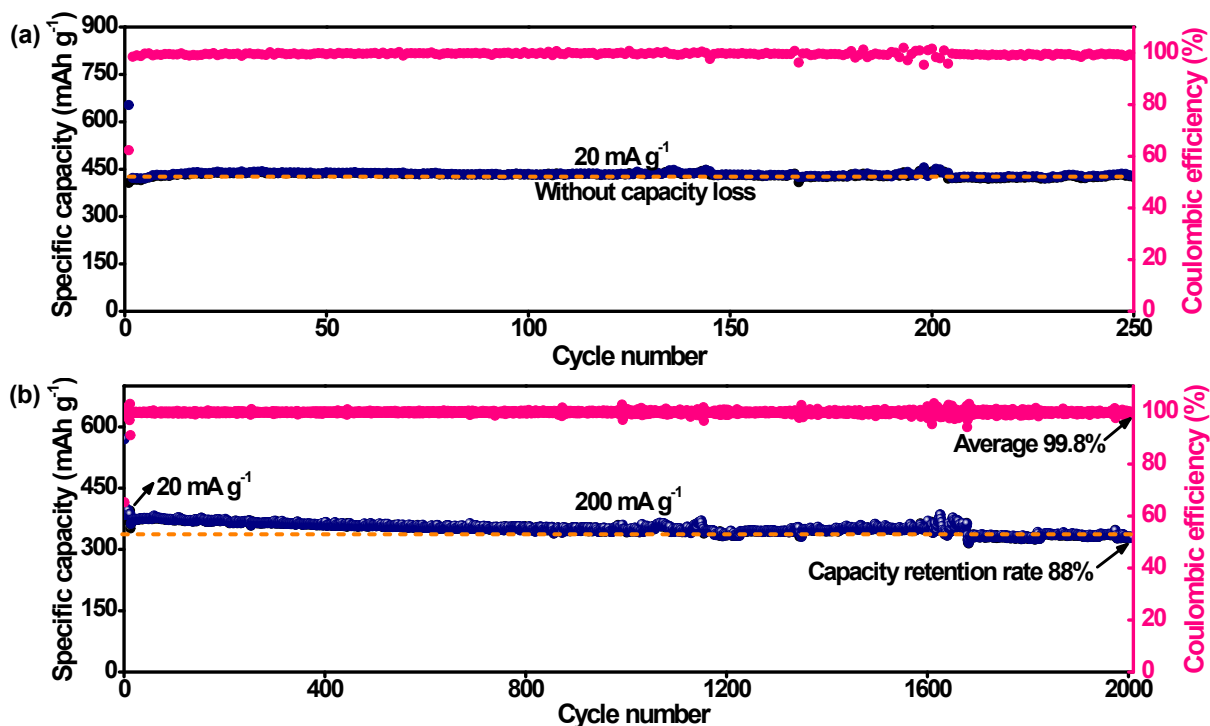

**Figure S16.** (a) Cycling stability at 20 mA g<sup>-1</sup> and (d) long-life cycling performance at 200 mA g<sup>-1</sup> of PCNF/S composite electrode based on the total mass of the composite electrode.

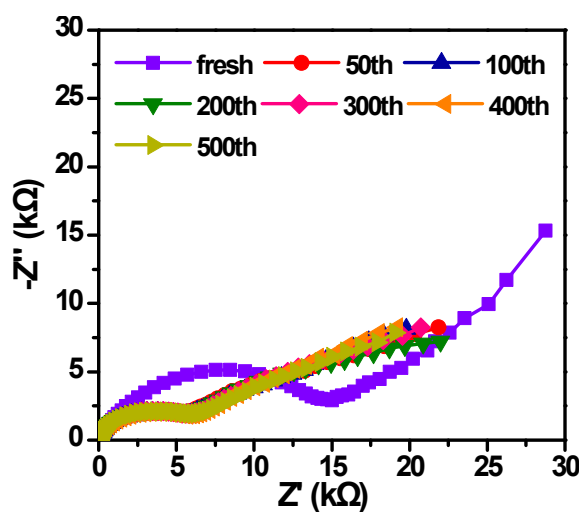

**Figure S17.** *In-situ* electrochemical impedance spectra evolution of the PCNF/S composite electrode at fresh state and fully depotassiated states with cycling.

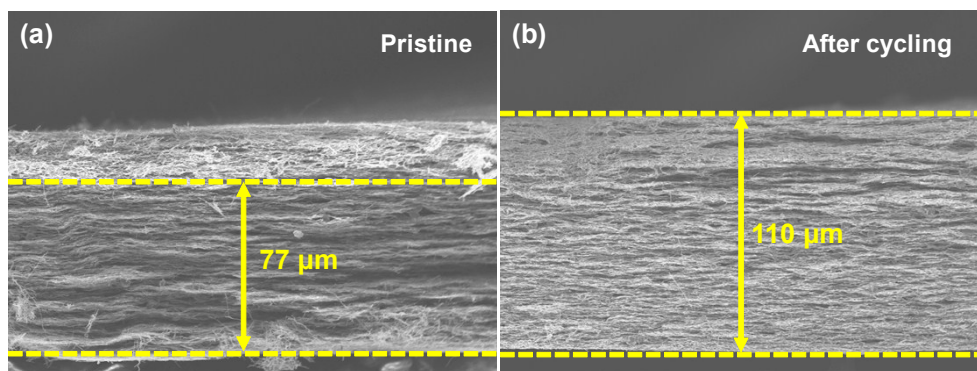

**Figure S18.** Cross-sectional SEM images of PCNF/S composite electrodes at (a) pristine state and (b) after cycling.

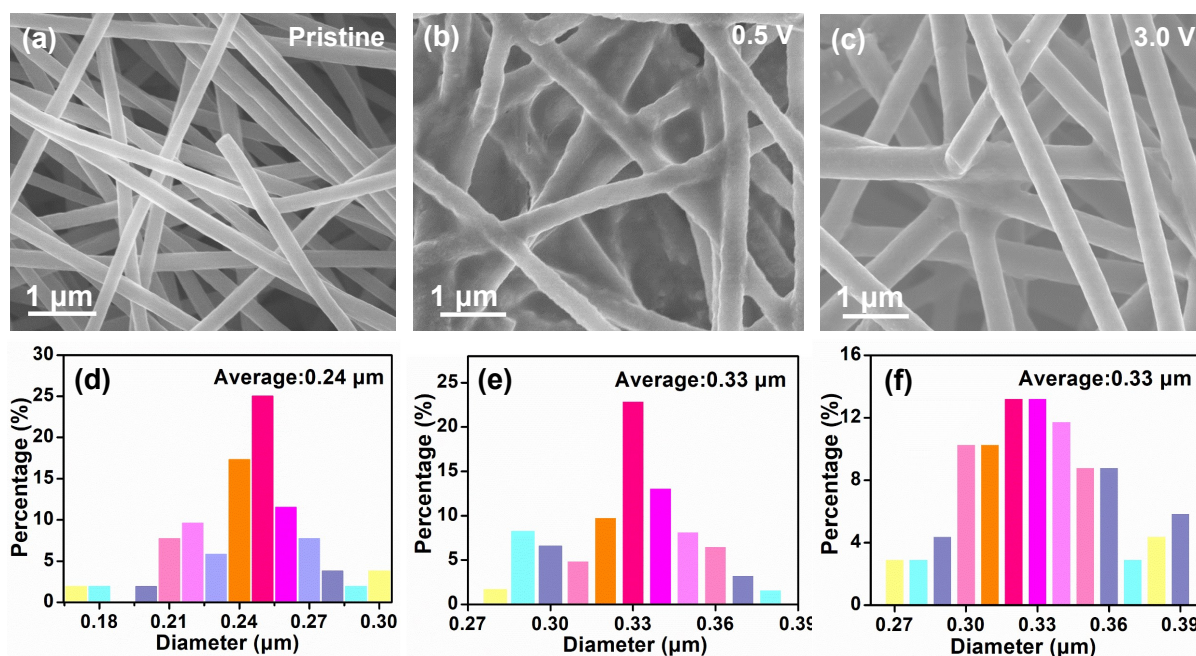

**Figure S19.** SEM images of the PCNF/S composite electrode at different states: (a) pristine, (b) potassiated to 0.5 V and (c) depotassiated to 3.0 V at the current density of 20 mA g<sup>-1</sup>, and (d-f) the corresponding diameter distributions.



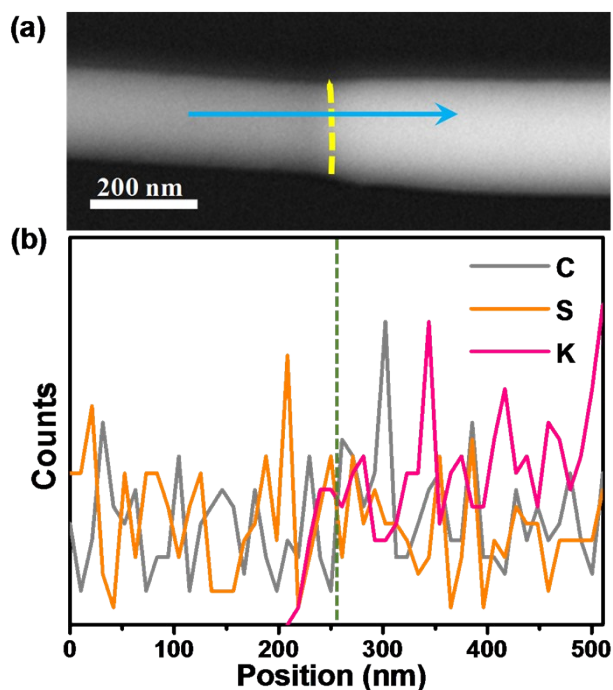

**Figure S20.** (a) HAADF-STEM image and (b) EDS line-scanning analysis of the PCNF/S composite electrode along with the marked line of blue arrow during the *in-situ* TEM experiment.

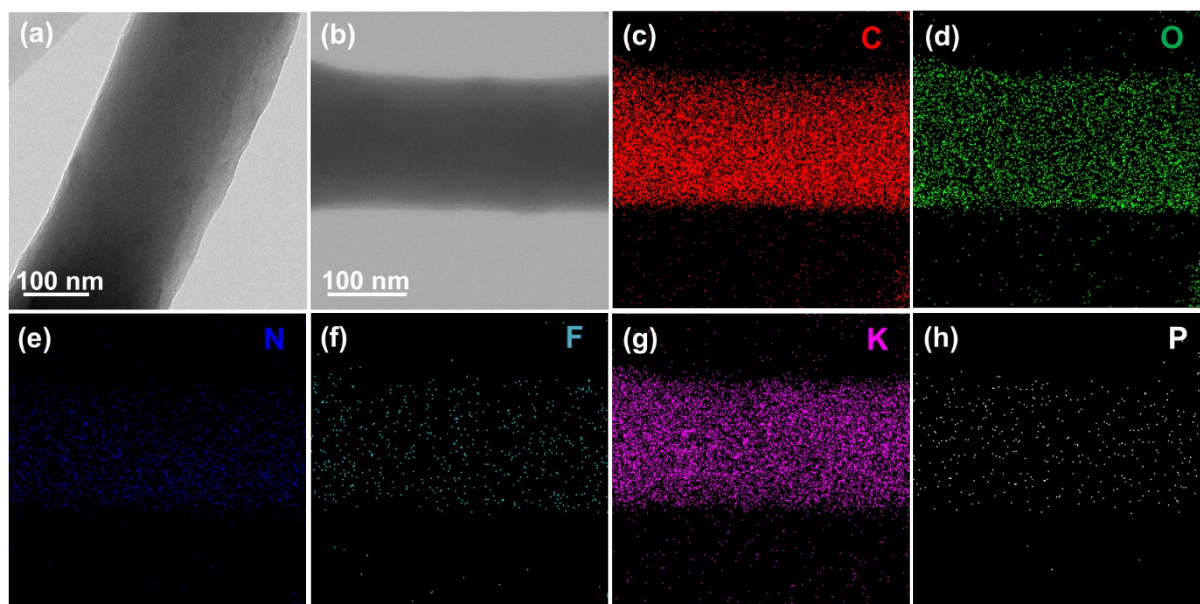

**Figure S21.** Morphology and structural characterization of the tested PCNF/S composite electrode after 200 cycles at  $20 \text{ mA g}^{-1}$  with the electrolyte of  $0.8 \text{ M KPF}_6$  in EC/DEC: (a) TEM, (b) light-field and (c-h) EDS element mapping images of C, O, N, F, K and P, respectively.

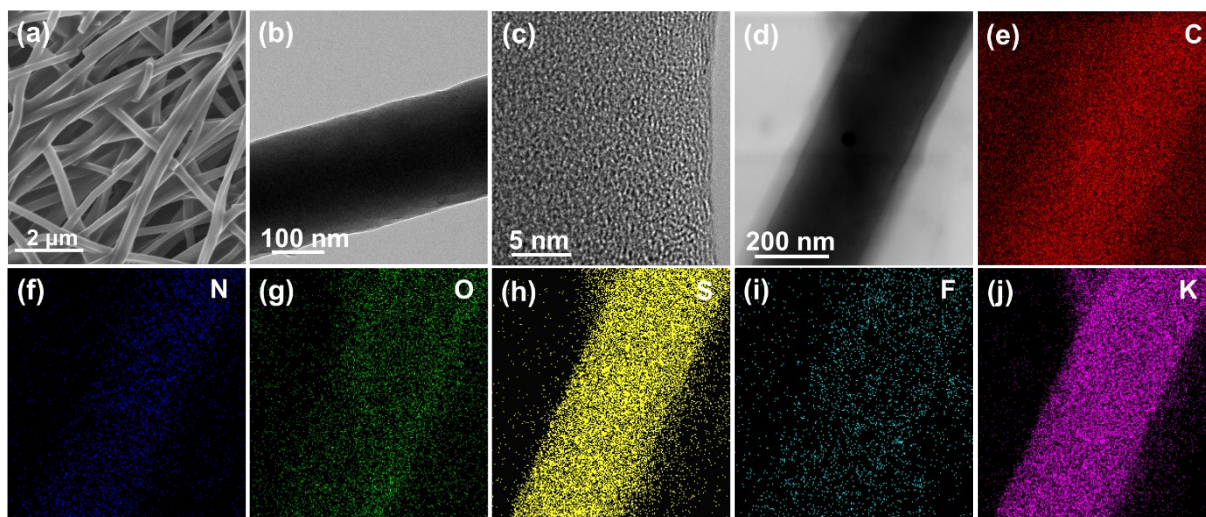

**Figure S22.** Morphology and structural characterization of the tested PCNF/S composite electrode after 200 cycles at  $20 \text{ mA g}^{-1}$  with the electrolyte of 1.0 M KFSI in DME: (a) SEM, (b) TEM, (c) HRTEM and (d) light-field and (e-j) EDS elemental mapping images of C, N, O, S, F and K, respectively.

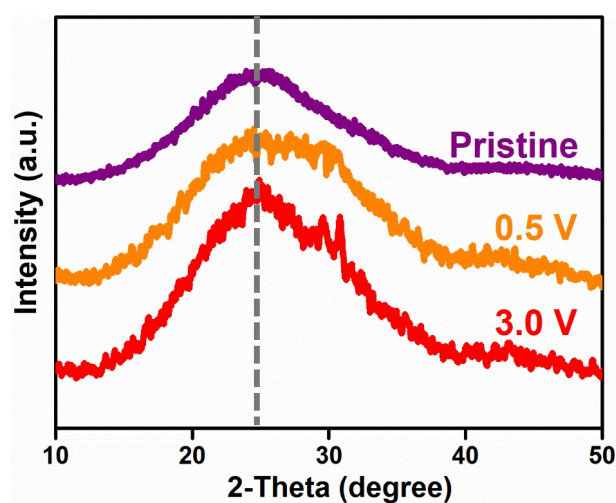

**Figure S23.** XRD patterns at pristine, potassiated to 0.5 V and depotassiated to 3.0 V states of the PCNF/S composite electrodes at the current density of  $20 \text{ mA g}^{-1}$  with 1.0 M KFSI in DME.



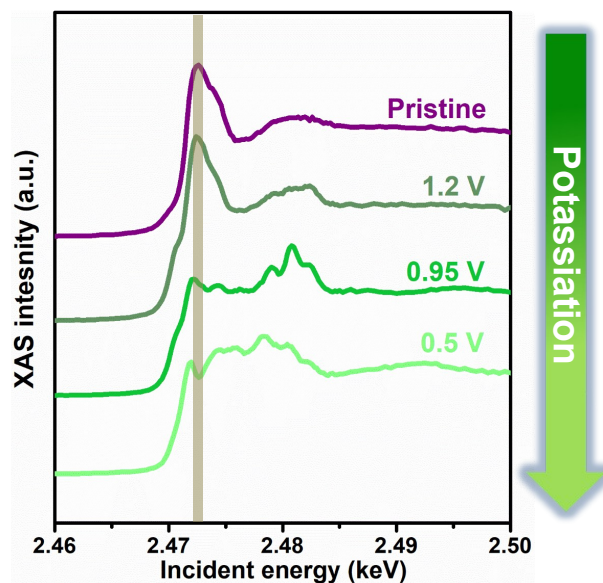

**Figure S24.** Sulfur K-edge XANES spectra of selected different potassiation states during the first potassiation process of the PCNF/S composite electrode in the electrolyte of 0.8 M  $\text{KPF}_6$  in EC/DEC.

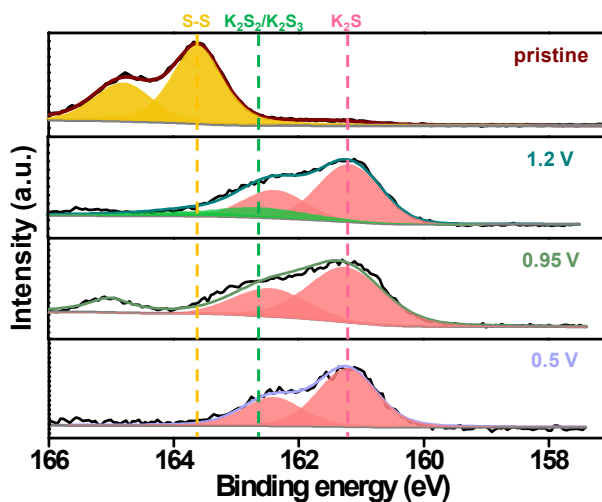

**Figure S25.** High-resolution XPS spectra of S 2p at different potassiated states during the first potassiation process of the PCNF/S composite electrode in the electrolyte of 0.8 M  $\text{KPF}_6$  in EC/DEC.

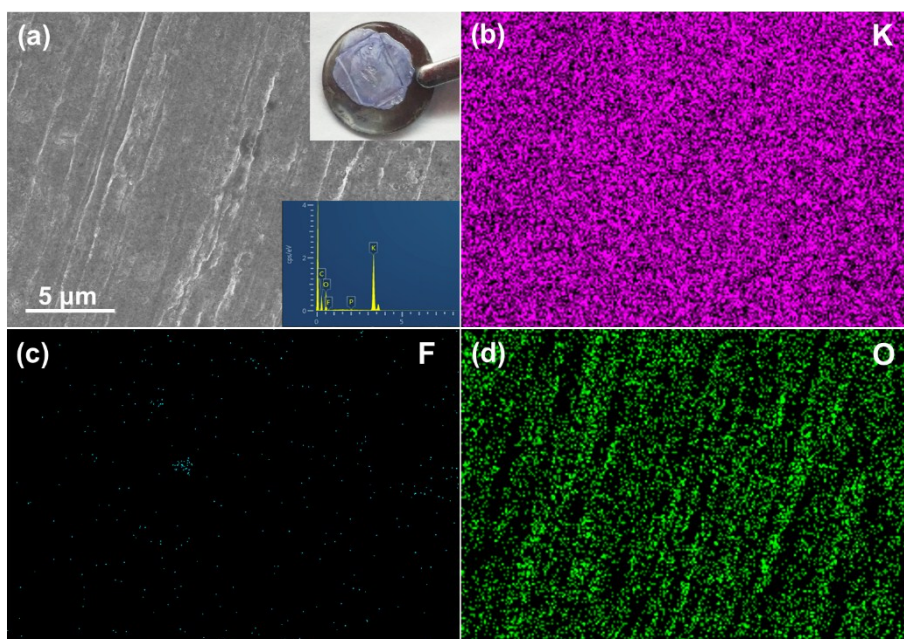

**Figure S26.** Structural and morphology characterization of the K metal anode after cycling: (a) SEM and (b-d) EDS elemental mapping images of the K metal anodes after 200 cycles at the current density of  $20 \text{ mA g}^{-1}$  in the electrolyte of  $0.8 \text{ M KPF}_6$  in EC/DEC. The insets show the optical photograph and the EDS energy spectrum of the K metal anode.

**Table S1.** Electrochemical performance comparison of sulfur cathodes in KIBs.

| Material                                | Sulfur content (wt%) | Voltage window (V) | Electrolyte amount ( $\mu\text{L}$ ) | Sulfur loading ( $\text{mg cm}^{-2}$ ) | Cycling (mAh $\text{g}^{-1}$ ) @cycle life | Capacity retention (%) | Ref.      |
|-----------------------------------------|----------------------|--------------------|--------------------------------------|----------------------------------------|--------------------------------------------|------------------------|-----------|
| PCNF/S                                  | 25                   | 0.5-3.0            | 50                                   | 0.5-1                                  | 1002.4@2000 at 200 mA $\text{g}^{-1}$      | 88                     | This work |
| PANI@CMK-3/sulfur                       | 39.2                 | 1.2-2.4            | ---                                  | ---                                    | 329.3@50 at 50 mA $\text{g}^{-1}$          | 63                     | S8        |
| 70S/30CNT                               | 70                   | 1.2-3.0            | 80                                   | 0.478                                  | 184@5 at 50 mA $\text{g}^{-1}$             | 26                     | S9        |
| $\text{K}_2\text{S}_x$ catholyte/3D-FCN | 30                   | 1.2-2.4            | 50                                   | 0.56                                   | 376@20 at 55.8 mA $\text{g}^{-1}$          | 94                     | S10       |
| SPANs                                   | 38                   | 0.8-2.9            | ---                                  | 0.38                                   | 387@100 at 125 mA $\text{g}^{-1}$          | 54                     | S11       |
| S/CNF                                   | ---                  | 1.0-2.8            | 20                                   | 1                                      | 600@50 at 114.4 mA $\text{g}^{-1}$         | 53                     | S12       |
| CMK-3/S                                 | 76                   | 1.2-3.0            | ---                                  | 1.8-2.0                                | 220@10 at 10 mA $\text{g}^{-1}$            | 36                     | S13       |
| SPAN (PAA binder)                       | 45.5                 | 0.3-3.0            | ---                                  | ---                                    | 450@300 at 837 mA $\text{g}^{-1}$          | 49                     | S14       |
| CCS (SPAN)                              | 39.25                | 0.8-3.0            | 120                                  | 0.39-0.59                              | 672@300 at 150 mA $\text{g}^{-1}$          | 86                     | S15       |
| Microporous C/S                         | 18.6                 | 0.5-3.0            | ---                                  | 0.5-1.0                                | 869.9@150 at 20 mA $\text{g}^{-1}$         | 73                     | S16       |
| SPAN                                    | 39.52                | 0.5-3.0            | ---                                  | ---                                    | 490@100 at 35 mA $\text{g}^{-1}$           | 95                     | S17       |
| I-S@pPAN                                | 42                   | 0.8-2.9            | 246                                  | 0.42                                   | 388@180 at 1675 mA $\text{g}^{-1}$         | 54                     | S18       |

\*Capacities are calculated based on the mass of sulfur.

**Video S1.** *In-situ* TEM experiment video during potassiation/depotassiation processes.

## Reference

- S1. Y. Yao, M. Chen, R. Xu, S. Zeng, H. Yang, S. Ye, F. Liu, X. Wu, Y. Yu, *Adv. Mater.* **2018**, *30*, 1805234.
- S2. L. Fan, R. Ma, J. Wang, H. Yang, B. Lu, *Adv. Mater.* **2018**, *30*, 1805486.
- S3. B. Li, J. Zhao, Z. Zhang, C. Zhao, P. Sun, P. Bai, J. Yang, Z. Zhou, Y. Xu, *Adv. Funct. Mater.* **2019**, *29*, 1807137.
- S4. X. Lin, J. Huang, H. Tan, J. Huang, B. Zhang, *Energy Storage Mater.* **2019**, *16*, 97.
- S5. T. Deng, X. Fan, J. Chen, L. Chen, C. Luo, X. Zhou, J. Yang, S. Zheng, C. Wang, *Adv. Funct. Mater.* **2018**, *28*, 1800219.
- S6. H. Gao, L. Xue, S. Xin, J. Goodenough, *Angew. Chem. Int. Ed.* **2018**, *57*, 5449.
- S7. Z. Jian, Y. Liang, I. Rodríguez-Pérez, Y. Yao, X. Ji, *Electrochem. Commun.* **2016**, *71*, 5.
- S8. Q. Zhao, Y. Hu, K. Zhang, J. Chen, *Inorg. Chem.* **2014**, *53*, 9000.
- S9. S. Gu, N. Xiao, F. Wu, Y. Bai, C. Wu, Y. Wu, *ACS Energy Lett.* **2018**, *3*, 2858.
- S10. J.-Y. Hwang, H.-M. Kim, C. S. Yoon, Y.-K. Sun, *ACS Energy Lett.* **2018**, *3*, 540.
- S11. Y. Liu, W. Wang, J. Wang, Y. Zhang, Y. Zhu, Y. Chen, L. Fu, Y. Wu, *Chem. Commun.* **2018**, *54*, 2288.
- S12. X. Yu, A. Manthiram, *Energy Storage Mater.* **2018**, *15*, 368.
- S13. L. Wang, J. Bao, Q. Liu, C.-F. Sun, *Energy Storage Mater.* **2019**, *18*, 470.
- S14. J.-Y. Hwang, H. Kim,; Y.-K. Sun, *J. Mater. Chem. A* **2018**, *6*, 14587.
- S15. R. Ma, L. Fan, J. Wang, B. Lu, *Electrochim. Acta* **2019**, *293*, 191.
- S16. P. Xiong, X. Han, X. Zhao, P. Bai, Y. Liu, J. Sun, Y. Xu, *ACS Nano* **2019**, *13*, 2536.
- S17. Y. Zhang, J. Lou, Y. Shuai, K. Chen, X. He, Y. Wang, N. Li, Z. Zhang, F. Gan, *Mater. Lett.* **2019**, *242*, 5.
- S18. S. Ma, P. Zuo, H. Zhang, Z. Yu, C. Cui, M. He, G. Yin, *Chem. Commun.* **2019**, *55*, 5267.
